# Supplementary material for: Viral metagenomics of aphids present in bean and maize plots on mixed-use farms in Kenya reveals the presence of three dicistroviruses including a novel Big Sioux River virus-like dicistrovirus
Source: Springer Nature journal article supplement (doi:10.1186/s12985-017-0854-x), 2017-10-02
Supplement: MOESM11 [file 15099698]

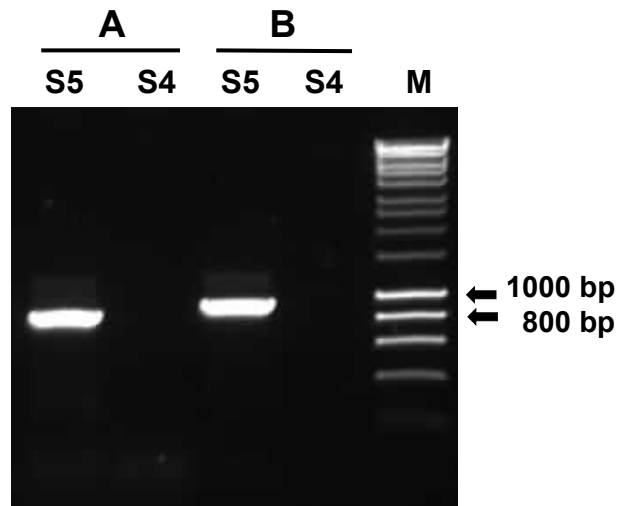

**Additional File 11 Fig. S2** RT-PCR confirmation of *Rhopalosiphum padi* virus in maize samples collected from Kitui County. RT-PCR, using two independent primer sets specific for *Rhopalosiphum padi* virus (RhPV), was used to confirm the presence of RhPV in two samples (T2F3S4 (abbreviated as S4) and T2F2S5 (abbreviated as S5) where RhPV had been detected following *de novo* sequence assembly in Trinity. PCR amplification products were analyzed by electrophoresis on a 2% agarose gel and visualized by ethidium bromide staining and UV illumination. The expected product size for amplified DNA products using primer pair RPV\_200\_F1 / RPV\_1100\_R1 (A) was 789 base-pairs (bp) while that of RPV\_1350\_F1/ RPV\_2300\_R1 (B) was 836 bp. Lane M was loaded with DNA size markers and positions of the 800 and 1000 bp markers are indicated.
