# Supplementary material for: Viral metagenomics of aphids present in bean and maize plots on mixed-use farms in Kenya reveals the presence of three dicistroviruses including a novel Big Sioux River virus-like dicistrovirus
Source: Virol J. 2017 Oct 2;14:188. doi: 10.1186/s12985-017-0854-x (PMC5625602; doi:10.1186/s12985-017-0854-x)
Supplement: Supplementary file 3 — List of primers used for RT-PCR and sequences generated. (XLSX 18 kb) [file 12985_2017_854_MOESM3_ESM.xlsx]

## Sheet: PRIMERS
Additional file 3: Table S2. List of primers used for RT-PCR and sequences generated.
Primer
BSRV	FORWARD PRIMER	REVERSE PRIMER	Region amplified	product size (bp)
ORF1	BSRV1FWD-5'-ACAATTTATATCGTTTAGGTT-3'	BSRV1REV-5'-TTACTAAGGTTTAAATCTTTA-3'	1740-2246	506
ORF2	BSRV2FWD-5'-GTCAAAACTAAATTTCATTCA-3'	BSRV2REV-5'-GGTGTAATCATGTGAAATCTT-3'	8467-9022	555
ALPV
ORF1	ALFWD1-5'CAAAACAATACAAAATGTC-3'	ALRV1-5'-GGTTTGTTTAAAATCGTTGCC-3'	511-1015	511
ORF2	ALFWD2-5'-CAGAAATTCACCTGCAAATTT-3'	ALRV2-5'-GGATAAATCCAGATCTACACG	6798-7318	514
RhPV
ORF1	RPV_200_F1-5'-TTTGGAAGACGTGTGCGAGA-3'	RPV_1100_R1-5'-TCGTGCAGCTGAGAACGAAT-3'	228-1016	789
ORF1	RPV_1350_F1-5'-GATGGGTACACTGGACAGCC-3'	RPV_2300_R1-5'-CTCTCGCTCGCAGCAAATTC-3'	1401-2236	836

## Sheet: RHPV SEQUENCES
RhPV SEQUENCES FROM SANGER SEQUENCING FOLLOWING RT-PCR (Sample T2F2S5)
Primer RPV_200F
TGCTTAGGGACTTTGTTTTGGAAACATTGCCTACTTTTTGTAAGAAGACAATATTTCTTATATTTGAGCATTTGAGTGCTTTTATTCTTGACAAAGTTCAGAATTTTATCATTAAGCTTAAGAATTATGATATTCATGAGATTATTATATATATTTGTAATTTATTTTTAGTTGCCTTAGCTTTCTCATTACCATCAGAATCTATTACAACAGTGGGGCGTGTTATTATGTGCATAGTATCTGCAGCCTCAATAGTTGGTAGATCTNTGTTGGGAACAGGAGGAAATATGGCNTTTTTAACTATNTTATTACTTTGTAAACCACATGTAANTACTTTTAATGTGAAATTGCANGGAAGCGAGCTTTCTTTTCAAGGAGAAGAGAGTGAGTTTAGAGAGG…
Primer-RPV_1100R
TGATACNGCANTACATATGNNCAATTTCAGCCATTCTCTCTGGATCATGAATTTTAATAGCCTCACTTTGCTTACATAACTTCATAGTCTCNATAAAAAGATGTTCAACATCAGGTATGTTTCTAGCACTACAATANTCTTTACCATATACATATTTACAAATCATTTTTGCGGTTTGATCGAACACATCAAGAAAATGTTCACTCAAAATACTCCACGTCTGATATGAACGTCCTACTAAAGCAGAACGTCTCANNAATTCATCAAGACTTTTNNNNNNNGTAGGAATTTCCATTCCAGCNNNNNNNAGTCCTGANAACGTTAAAGCAGTTAACATATGATACAACCATTTCTTGAANTCCTCTCTAAACTCACTCTCTTCTCCTTGAAAAGAAAGCT…
Primer-RPV_1350F
ATGGTTGNNTCTNNATTAAAACCCNATCCTGAATTTTTTGAAATAATAAGAACTGTAAACATTTTCCCATATCAATTACATAGTGCTGCTCTTGAGGAAAAAGCAAACAACGCATTTAGAGCTAAATTTGTTGTGTGTACAACTAATGCCACAAATTTTGATGTTAAAAGTATTATTGAACCAGAAGCATTCAAGCGTCGGATGCATTTAGTTTATGAAGTTCAATTAATTCCAGAAGTACAAGGACAGATTGGACTTGATGTAAATAAATTAAAAGCTTATAGAGAGAGAAATAACCTCCCTCTCAGTGATATGTCTCACTATGTGTTTCGTAATAGTGTATCAAATGAGAATCTCAACTATAATCAATTAATTGTAAATATTTCGCGTAAATATGAG…
Primer-RPV_2300R
NTGNNNAGAATTCTTCTGCAGCACGTTTTCGTTCTTCCNCTAAATTCTGCAAGACTTCAAACACATCTTGCTCATTATTTAATCGGATCTCTCTAGCACAAATGTACTTGTGAGCTGTTAAAACCATTACNGNNNAAAGGACATTANAAGTTAAACTA

## Sheet: ALPV SEQUENCES
ALPV SEQUENCES FROM SANGER SEQUENCING FOLLOWING RT-PCR
P7 FWD ORF1
GCGGTATAAAACTAATATTGAACTAAGAGCTCCACGTCTGGCGCTTCACTATCTACTCCTGAATTAATCAGCTGAAGATA
CGCGATGCACAGGCACACGAACAACCGCGAATTGTTGCACAATTGACTCGTTCGGCTCTTGAGAACATGAATAATGTTTA
CATTATGACTGATTCTCTTGATGCTATACCCGAGAATACATTGCGTAGACAAGTCTTGGCTTATATTACGGAATTTAATG
AATCTCATAACGGTGTTGCTCGCCCAAGTCGTATTGCACAACTTGACAGTAACATCGCTTATTTGACGCTATATTTGGAT
TATTTGATGCAACATTTGAAGACACACTCCCAAGTTAAGGACTGTTTCTTTTTAATGTTGAAGACTATTGCTATTGCTAA
AGAACACATTTTTGTTAAAGATGACACTTTTTACTCAATGGCTATATCTCTTCGTTTAATAAACGCATCATTGGCAACGA
TTTAAAACAAACCCAATCGATGATAGGGGGGGGGGGGGGGGGCTTTTTCCCCCCCCACCCCACGAGTGGAAGAGAGGAGA
GACAAAAAACAATCATA
P7 REV ORF2
ACGGGAACAGACGAGAGAATAGCCATTGAGTAAAAGTGTCATCTTTAACAAAAATGTGTTCTTTAGCAATAGCAATAGTC
TTCAACATTAAAAAGAAACAGTCCTTAACTTGGGAGTGTGTCTTCAAATGTTGCATCAAATAATCCAAATATAGCGTCAA
ATAAGCGATGTTACTGTCAAGTTGTGCAATACGACTTGGGCGAGCAACACCGTTATGAGATTCATTAAATTCCGTAATAT
AAGCCAAGACTTGTCTACGCAATGTATTCTCGGGTATAGCATCAAGAGAATCAGTCATAATGTAAACATTATTCATGTTC
TCAAGAGCCGAACGAGTCAATTGTGCAACAATTCGCGGTTGTTCGTGTGCCTGTGCATCGCGTATCTTCAGCTGATTAAT
TTCAGGAGTAGATAGTTGAAGCGCCAGACGTGGGAGCATCATTGAAAAAGTTTCTGACATTTTGTATTGTTTTG
P7 FWD ORF2
GCGCGGGGGCGATTCTCTCTTTTCGGAGTAGATGTACACAACAATTTTAACTTTCTCTTCAGAAGGTATGACCCCCTCCA
CTAGTATTTATACTGACCCATTAGATTTAGATATGTCTTATCTAACATCCGTAGATGACGGTCGCAATCACTCTATCATA
GATTTTCTGCAGCGTCCAATCAATATTCAAAATATTGAGTGGTCTGCTAATGACAATGCTGGTAAAACGCTCATGGCGGT
AGATTTACCCCTTGATCCGATTATCAACAACTCTATGTATAAAGCGAAGTGTGAACGTTTTTATGGATTTAGAGCCGATG
TAGAATTAAAATTACAAGTTAACGCTCAACCTTTCCAAGCTGGGCGTTTATTATTAGTTTATATCCCTGGTTATAAATAT
TTAGGAGAAGACCGACAAAAATATTATGATGATCGCGATAATGTTGATGATGCTAGTCTGGTACCACTCACTGGTTCACC
TCGTGTAGATCTGGATTTATCCCACCGATCTAGGACCGATCACATAGTCGCTTCCCCTAATTTTAATTTTTTGGACATCT
AGTATTTCTGTTCGTCTTCTCTAATTTTTCTTTCA
P7 REV ORF2
CAAGGGGGGGGGTCCAGACTAGCATCATCAACATTATCGCGATCATCATAATATTTTTGTCGGTCTTCTCCTAAATATTT
ATAACCAGGGATATAAACTAATAATAAACGCCCAGCTTGGAAAGGTTGAGCGTTAACTTGTAATTTTAATTCTACATCGG
CTCTAAATCCATAAAAACGTTCACACTTCGCTTTATACATAGAGTTGTTGATAATCGGATCAAGGGGTAAATCTACCGCC
ATGAGCGTTTTACCAGCATTGTCATTAGCAGACCACTCAATATTTTGAATATTGATTGGACGCTGCAGAAAATCTATGAT
AGAGTGATTGCGACCGTCATCTACGGATGTTAGATAAGACATATCTAAATCTAATGGGTCAGTATAAATACTAGTGGAGG
GGGTCATACCTTCTGAAGAGAAAGTTAAAATTTGTTGTTGTTCATGTGTCATTTGTGTTTCTTGAAAATTTGCAGGTGAA
TTTCTG
P9 FWD ORF1
CCATTTCATTAATGTATTCGGATTTTGAGCTCACGTCTGGCGCTTCACTATCTACTCCTGAATTAATCAGCTGAAGATAC
GCGATGCACAGGCACACGAACAACCACGAATTGTTGCACAATTGACTCGTTCGGCTCTTGAGAACATGAATAATGTTTAC
ATTATGACTGATTCTCTTGATGCTATACCCGAGAATACATTGCGTAGACAAGTCTTGGCTTATATTACGGAATTTAATGA
ATCTCATAACGGTGTTGCTCGCCCAAGTCGTATTGCACAACTTGACAGTAACATCGCTTATTTGACGCTATATTTGGATT
ATTTGATGCAACATTTGAAGACACACTCCCAAGTTAAGGACTGTTTCTTTTTAATGTTGAAGACTATTGCTATTGCTAAA
GAGCACATTTTTGTTAAAGATGACACTTTTTACTCAATGGCTATATCTCTTCGTTTAATAAACGCATCATTGGCAACGAT
TTTAAACAAACCCTA
P9 REV ORF1
GGGGTGCATACGAGAGAATAGCCATTGAGTAAAAGTGTCATCTTTAACAAAAATGTGCTCTTTAGCAATAGCAATAGTCT
TCAACATTAAAAAGAAACAGTCCTTAACTTGGGAGTGTGTCTTCAAATGTTGCATCAAATAATCCAAATATAGCGTCAAA
TAAGCGATGTTACTGTCAAGTTGTGCAATACGACTTGGGCGAGCAACACCGTTATGAGATTCATTAAATTCCGTAATATA
AGCCAAGACTTGTCTACGCAATGTATTCTCGGGTATAGCATCAAGAGAATCAGTCATAATGTAAACATTATTCATGTTCT
CAAGAGCCGAACGAGTCAATTGTGCAACAATTCGTGGTTGTTCGTGTGCCTGTGCATCGCGTATCTTCAGCTGATTAATT
TCAGGAGTAGATAGTTGAAGCGCCAGACGTGGGAGCATCATTGAAAAAGTTTCTGACATTTTGTATTGTTTTGGCGAGTT
CC
P9 FWD ORF2
GGCATATGGGGGGTAGTTTTGGATGCAGAATCTCCTTTAACCAAAATCAGAAGGTATGACCCCCTCCACTAGTATTTATA
CTGACCCATTAGATTTAGATATGTCTTATCTAACATCCGTAGATGACGGTCGCAATCACTCTATCATAGATTTTCTGCAG
CGTCCAATCAATATTCAAAATATTGAGTGGTCTGCTAATGACAATGCTGGTAAAACGCTCATGGCGGTAGATTTACCCCT
TGATCCGATTATCAACAACTCTATGTATAAAGCAAAGTGTGAACGTTTCTATGGATTTAGAGCCGATGTCGAATTAAAAT
TACAAGTTAACGCTCAACCTTTCCAAGCTGGGCGTTTATTATTAGTTTATATTCCTGGTTATAAATATTTAGGAGAAGAC
CGACAAAAATATTATGACGATCGCGATAATGTTGATGATGCTAGTCTGGTACCACTCACTGGTTCACCTCGTGTAGATCT
GGATTTATCCGCCTG
P9 REV ORF2
GGCAAAGGGGGGGAATTCTAAATGTGATCTTCGGGTTTCCGGGGGCGTCCCCGATTTTTGCCGGTCTTCTCCTAATAAGG
TAAGCAGGAATATAAACTAATAATAAACGCCCAGCTTGGAAAGGTAGAGCGTTAACTTGTAATTTTAATTCGACATCGGC
TCTAAATCCATAGAAACGTTCACACTTTGCTTTATACATAGAGTTGTTGATAATCGGATCAAGGGGTAAATCTACCGCCA
TGAGCGTTTTACCAGCATTGTCATTAGCAGACCACTCAATATTTTGAATATTGATTGGACGCTGCAGAAAATCTATGATA
GAGTGATTGCGACCGTCATCTACGGATGTTAGATAAGACATATCTAAATCTAATGGGTCAGTATAAATACTAATGGAGGG
GGTCATACCTTCTGAAGAGAAAGTTAAAATTTGTTGTTGTTCATGTGTCATTTGTGTTTCTTGAAAATTTGCAGGTGAAT
TTCCAATGCCT

## Sheet: BSRV SEQUENCES
BSRV SEQUENCES FROM SANGER SEQUENCING FOLLOWING RT-PCR
SAMPLE P5 FWD ORF1		SAMPLE P6 FWD ORF2
GGCCTGTTTATTCAGTTTTACCAAATAATTTTGAACATGACGCAAATTATTCAAC		TTANGTACCNGGCCTGTTTANTTCGGTTTTACCAAACAATTTTGAACATGACGCAAATTACTCGA
TGTAGTTGACTTAAGATCTGATACAGATGTGGAATTTAATCTCCCGTATGTAGCTACCGTCCCGTGGTTGCATATTAAAG		CCGTAGTTGACCTAAGATCTGATACAGATGTGGAATTTAATCTCCCGTATGTAGCTACTGTCCCGTGGTTGCATATTAAA
AAAGTCCGTGGATAGGAGCGTTTAATCAAACACAGGTTTGCGGTTCTGTCTACATGGAAGTTTTAAATGAACTAGTCAAT		GAAAGTCCGTGGATAGGAGCGTTTAACCAAACACAGGTTTGCGGTTCTGTCTACATGGAAGTTTTAAATGAACTAGTCAA
ACGTCAACTGTATCCGATACTGTAGAAGTTTTAGTGGAAGTTTGTGGAGCCGAGGATATCGAATTCGCTGTACCTATACA		TACGTCAACTGTATCTGATACTGTANAAGTTTTAGNGGAAGTTTGTGGAGTATCNGATACCGATG
GCCTAATCTATGTCCACGTGAGAAGCCTAATAATCGCGCACGCAATGTCATGCAGATATTAACTTCAAGCGTTGCACAAG
TTGGCACGGACACGGGTGACACTCCTCTAGAGGATGCGCGCGTTGAACCGACCAACTTTTCTGAAGTACCACTACAACCT		SAMPLE P6 REV ORF2
CNTACNAGTACTTACAATGAAGCTATGTTAACTATGGGAGAGAAGAT		GATGTTATCTTCTCTCCCATAGTTAACATAGCTTCATTGTAAGTAGTCGTATGTGGCTGTAATGGA
		ACTTCAGCAAAGTTGGTCGGTTCAACGCGCGCATCCTCTAGAGGAGTGTCACCCGTGTCCGTGCCAACTTGTGCAACGCT
SAMPLE P5 REV ORF1		TGAAGTTAATATCTGCATGACATTGCGTGCGCGATTATTAGGCTTCTCACGTGGACATAGATTAAGCTGTATAGGTACAG
GATGTTATCTTCTCTCCCNTAGTTAACATAGCTTCATTGTAAGTAGTCGTATGTGGTTGTAGTGGT		CANATTCNATATCCTCGGCTCCACAAACTTCCACTAAAACTTCNACAGTATCAGATACAGTTGACGTATTGACTA
ACTTCAGNAAAGTTGGTCGGTTCAACGCGCGCATCCTCTAGAGGAGTGTCACCCGTGTCCGTGCCAACTTGTGCAACGCT
TGAAGTTAATATCTGCATGACATTGCGTGCGCGATTATTAGGCTTCTCACGTGGACATAGATTAGGCTGTATAGGTACAG		SAMPLE P7 FWD ORF2
CGAATTCNATATCCTCGGCTCCACAAACTTCCACTAAAACTTCTACAGTATCGGATACAGTTGACGTATTGACTAGTTCA		GTACCNGGCCTGTTTATTCGGTTTTACCAAACAATTTCGAACATGACGCAAATTACTCGAC
TTTAAAACTTCCATGTAGACAGAACCGCAAACCTGTGTTTGATTAAACGCTCCTATCCACGGACTTTCTTTAATATGCAA		CGTAGTTGACCTAAGATCTGATACAGATGTGGAATTTAATCTCCCGTATGTAGCTACTGTCCCGTGGTTGCATATTAAAG
CCACGGGACGGTAGCTACATACGGGAGATTAAATTCCACATCTGTATCAGATCTTAAGTCAACTACAGTTGAATAATTTG		AAAGTCCGTGGATAGGAGCGTTTAACCAAACACAGGTTTGCGGTTCTGTCTACATGGAAGTTTTAAACGAACTAGACAAT
CGTCATGTTCAAAATTATTTGGTAAAACTGAATTAAACAGGCCNGGTACATAAAAAANGCGCACTCGTCCTGAATGAAAT		ACATCAACTGTATCTGATACTGTANAAATTTTTCNGTTAAAATTTTTNAANTTAACAAATNCNNTTGATGTGTTGACTA
TTAGTTTTGACA
		SAMPLE P7 REV ORF2
SAMPLE P6 FWD ORF1		GATGTTATCTTCTCTCCCNTAGTTAACATAGCTTCATTGTAAGTAGTTGTATGTGGTTGTANNGGGAC
TGTTTATGAACGTGACGGCATCTATTATGCAATCGGATATGCCTGCGAACTTACTAC		TTCAGCAAAGCTGGTCGGTTCAACGCGTGCATCCTCTAAAGGAGTGTCACCCGTGTCCGTGCCAACTTGCGCAACGCTTG
CCCAACTGAGGGAAATATTCTGTACTTCGACTGCACAGTCTGCTTACATTGACGGACAATTAGTATTAAGACTTTTAGCC		AAGTTAATATCTGCATGACATTGCGTGCGAGATTATTAGGCTTCTCACGTGGACATATATTAAGCTGTATAGGTACAGCG
TTATGCTCTTTTTCGTTGATGGTTAGTAAGATACCTACTTCTAAAGACATTGATATTTTTATTAATCGTCTTGATCGAGT		AACTCGATGTCCTCGGCTCCACAAACTTCCACTAAAACTTCTACAGTATCAGANACNGTTGATGTATTGACTAG
TCCAAAAGCATTGAGTGGAATGGAGAGTATGTGGAAACGCATAGACTCTGTTTCAACAGTGTTATGGAATTGGATGGAAG
TGACTGTGTTGAAGAGGGAAGGAGTAATACCTCGATCTGATATCCTTGATTCTGTTTCTAAGTGGGCCAATGAACTTAGC		SAMPLE P9 REV ORF2
CGTTTGTTGACTCTAGCCTCGCAAAGAGAAATCCAGCGAGACGTTGAAACCTTACATGCTGCAGGACGGATGTATTCTGA		GATGTTATCTTCTCTCCCATAGTTAACATAGCTTCATTGTAAGTAGTCGTATGTGGCTGTAATGGAACT
AGGAATACGCCTAATGAANCAATGTAAAGATTTAAA		TCAGCAAAGTTGGTCGGTTCAACGCGCGCATCCTCTAGAGGAGTGTCACCCGTGTCCGTGCCAACTTGTGCAACGCTTGA
		AGTTAATATCTGCATGACATTGCGTGCGCGATTATTAGGCTTCTCACGTGGACATAGATTAGGCTGTATAGGTACAGCAA
SAMPLE P6 REV ORF1		ATTCGATATCCTCGGCTCCACAAACTTCCACTAAAACTTCTACAGTATCAGATACAGTTGACGTATTGACTAGTTCATTT
GATACATCCGTCCTGCAGCATGTAAGGTTTCAACGTCTCGCTGGATTTCTCTTC		AAAACTTCCATGTAGACAGAACCGCAAACCTGTGTTTGGTTAAACGCTCCTATCCACGGACTTTCTTTAATATGCAACCA
GCGAGGCTAGAGTCAACAAACGGCTAAGTTCATTGGCCCACTTAGAAACAGAATCAAGGATATCAGATCGAGGTATTACT		CGGGACAGTAGCTACATACGGGAGATTAAATTCCACATCTGTATCAGATCTTAGGTCAACTACGGTCGAGTAATTTGCGT
CCTTCCCTCTTCAACACAGTCACTTCCATCCAATTCCATAACACTGTTGAAACAGAGTCTATGCGTTTCCACATACTCTC		CATGTTCAAAATTGTTTGGTAAAACCGAATTAAACAGGCCTGGTACGTAAAAAATA
CATTCCACTCAATGCTTTTGGAACTCGATCAAGACGATTAATAAAAATATCAATGTCTTTAGAAGTAGGTATCTTACTAA
CCATCAACGAAAAAGAGCATAAGGCTAAAAGTCTTAATACTAATTGTCCGTCAATGTAAGCAGACTGTGCAGTCGAAGTA
CAGAATATTTCCCTCAGTTGGGGTAGTAAGTTCGCAGGCATATCCGATTGCATAATAGATGCCGTCACGTTCATAAACAC
GTCTTGTGCAGACATTGCTCCTGAACCTAAACGATATAAATTGTA
