# Supplementary material for: Viral metagenomics of aphids present in bean and maize plots on mixed-use farms in Kenya reveals the presence of three dicistroviruses including a novel Big Sioux River virus-like dicistrovirus
Source: Virol J. 2017 Oct 2;14:188. doi: 10.1186/s12985-017-0854-x (PMC5625602; doi:10.1186/s12985-017-0854-x)
Supplement: Supplementary file 6 — BLAST results for aphid identification by CO1 gene from Sanger sequencing and Virfind. (XLSX 12 kb) [file 12985_2017_854_MOESM6_ESM.xlsx]

## Sheet: Sanger 
			Additional file 6: Table S3. BLAST results for aphid identification by CO1 gene from Sanger sequencing and Virfind.
Aphid sample ID	Query sequence length	Percentage of identical matches	Closest subject sequence GenBank identity
S16	692	99	AB506721.1| Aphis fabae
S17	697	99	AB506721.1| Aphis fabae
S18	691	99	AB506721.1| Aphis fabae
S19	692	99	AB506721.1| Aphis fabae
S20	696	99	AB506721.1| Aphis fabae
S21	689	99	AB506721.1| Aphis fabae
S22	689	99	AB506722.1| Aphis fabae
S23	690	99	AB506721.1| Aphis fabae
S24	701	99	AB506721.1| Aphis fabae
S25	696	99	AB506721.1| Aphis fabae
S26	692	99	AB506721.1| Aphis fabae
S27	693	99	AB506721.1| Aphis fabae
S28	690	99	AB506721.1| Aphis fabae
S29	691	99	AB506722.1| Aphis fabae
S30	690	99	AB506721.1| Aphis fabae
S31	692	99	AB506721.1| Aphis fabae
S32	692	99	AB506721.1| Aphis fabae
S33	688	99	AB506721.1| Aphis fabae
S34	692	99	AB506721.1| Aphis fabae
S35	693	99	AB506721.1| Aphis fabae
S36	693	99	AB506721.1| Aphis fabae
S37	681	99	AB506721.1| Aphis fabae
S38	691	99	AB506721.1| Aphis fabae
S39	688	99	AB506721.1| Aphis fabae
S40	690	99	AB506721.1| Aphis fabae
S41	691	99	AB506721.1| Aphis fabae
S42	690	99	AB506721.1| Aphis fabae
S43	680	99	AB506721.1| Aphis fabae
S44	687	99	AB506721.1| Aphis fabae
S45	691	99	AB506721.1| Aphis fabae

## Sheet: Virfind
Additional file 6: Table S3. BLAST results for aphid identification by CO1 gene from Sanger sequencing and Virfind.
Aphid sample ID	Query sequence length	Percentage of identical matches	Closest subject sequence GenBank identity
S17	1255	99.92	AB506721.1| Aphis fabae
S18	1254	99.75	AB506721.1| Aphis fabae
S19	1123	99.91	AB506721.1| Aphis fabae
S20	1310	99.92	AB506721.1| Aphis fabae
S21	1350	99.85	AB506721.1| Aphis fabae
S22	836	99.88	AB506722.1| Aphis fabae
S23	1462	99.93	AB506721.1| Aphis fabae
S24	1275	99.84	AB506721.1| Aphis fabae
S25	1218	99.92	AB506721.1| Aphis fabae
S26	992	99.9	AB506721.1| Aphis fabae
S27	1073	99.91	AB506721.1| Aphis fabae
S28	265	100	AB506721.1| Aphis fabae
S29	992	99.9	AB506722.1| Aphis fabae
S30	1192	99.58	AB506721.1| Aphis fabae
S31	1223	99.92	AB506721.1| Aphis fabae
S32	1144	99.91	AB506721.1| Aphis fabae
S33	1488	99.87	AB506721.1| Aphis fabae
S34	1206	99.92	AB506721.1| Aphis fabae
S35	1130	99.91	AB506721.1| Aphis fabae
S36	1425	99.86	AB506721.1| Aphis fabae
S37	1373	99.93	AB506721.1| Aphis fabae
S38	1310	99.92	AB506721.1| Aphis fabae
S39	1293	99.92	AB506721.1| Aphis fabae
S40	1259	99.92	AB506721.1| Aphis fabae
S41	1095	99.91	AB506721.1| Aphis fabae
S42	1241	99.92	AB506721.1| Aphis fabae
S43	1258	99.92	AB506721.1| Aphis fabae
S44	1359	99.85	AB506721.1| Aphis fabae
S45	1197	99.92	AB506721.1| Aphis fabae
